# Supplementary material for: Pollen Protein: Lipid Macronutrient Ratios May Guide Broad Patterns of Bee Species Floral Preferences
Source: Insects. 2020 Feb 18;11(2):132. doi: 10.3390/insects11020132 (PMC7074338; doi:10.3390/insects11020132)
Supplement: Supplementary file 1 [file insects-11-00132-s001.zip]

Archive with 4 entries (4 files):
- Protocol S1 pollen collection and protein lipid analysis.pdf
- __MACOSX/._Protocol S1 pollen collection and protein lipid analysis.pdf
- Table S2 species list and pl values.xlsx
- __MACOSX/._Table S2 species list and pl values.xlsx
