# Supplementary material for: Pollen Protein: Lipid Macronutrient Ratios May Guide Broad Patterns of Bee Species Floral Preferences
Source: Insects. 2020 Feb 18;11(2):132. doi: 10.3390/insects11020132 (PMC7074338; doi:10.3390/insects11020132)
Supplement: Supplementary file 1 [file insects-11-00132-s001.zip › Table S2 species list and pl values.xlsx]

## Sheet: species_out_R
#	Order	Family	Genus	Species	common name	bee/plant	collection method	source	dried (yes/no)	ug protein	Std Err(ug protein)	ug lipid	Std Err(ug lipid)	P:L	collector
1	Apiales	Apiaceae	Angelica	Angelica capitellata	Grayswamp whiteheads	plant	anther	flower	n	206.148	19.7082	136.349	14.904	1.51191	Francis
2	Arnica	Asteraceae	Arnica	Arnica spp	arnica	plant	anther	flower	n	74.999	3.55625	191.248	3.89505	0.392155	Vaudo and Francis
3	Asparagales	Amaryllidaceae	Allium	Allium cernuum	Nodding wild onion	plant	anther	flower	y	140.043	5.68037	36.3277	1.06985	3.85499	Jackson and Fiely
4	Asparagales	Iridaceae	Iris	Iris versicolor	Blueflag iris	plant	anther	flower	y	88.2738	5.19589	109.42	24.4028	0.806742	Jackson and Fiely
5	Asparagales	Iridaceae	Sisyrinchium	Sisyrinchium angustifolium	Narrowleaf blue-eyed grass	plant	anther	flower	y	194.046	73.9996	76.3329	15.1934	2.54211	Jackson and Fiely
6	Asterales	Asteraceae	Carduus	Carduus acanthoides	spiny thistle	plant	fresh	flower	n	237.125	9.76492	89.9941	4.28571	2.63489	Russo et al 2019a
7	Asterales	Asteraceae	Carduus	Carduus nutans	nodding thistle	plant	fresh	flower	n	204.756	12.5086	143.345	9.50872	1.42841	Russo et al 2020
8	Asterales	Asteraceae	Centaurea	Centaurea sp	Centaury	plant	bee	bee	n	60.0176	7.07368	49.4463	10.2205	1.21379	Vanderplanck and Michez
9	Asterales	Asteraceae	Cirsium	Cirsium sp	plume thistle	plant	bee	bee	n	83.7674	15.3935	52.1979	3.35105	1.6048	Vanderplanck and Michez
10	Asterales	Asteraceae	Coreopsis	Coreopsis tinctoria	tickseed	plant	fresh	flower	n	126.315	9.01237	155.177	12.1135	0.814	Russo et al 2019a
11	Asterales	Asteraceae	Echinacea	Echinacea purpurea	purple coneflower	plant	fresh	flower	y	171.429	5.79081	95.0303	12.6677	1.80394	Vaudo et al 2016
12	Asterales	Asteraceae	Eupatorium	Eupatorium perfoliatum	boneset	plant	fresh	flower	y	78.0044	5.01733	108.013	21.818	0.722176	Vaudo et al 2016
13	Asterales	Asteraceae	Eutrochium	Eutrochium purpureum	joe-pye weed	plant	fresh	flower	y	146.479	12.1834	158.764	14.6158	0.922622	Vaudo et al 2016
14	Asterales	Asteraceae	Gaillardia	Gaillardia pulchella	firewheel	plant	fresh	flower	n	111.993	0.282106	158.543	11.8826	0.706387	Russo et al 2019a
15	Asterales	Asteraceae	Helianthus	Helianthus annuus	sunflower	plant	bee	bee	n	73.2165	8.19985	82.6129	13.1002	0.886259	Vanderplanck and Michez
16	Asterales	Asteraceae	Helianthus	Helianthus annuus	sunflower	plant	fresh	flower	n	120.934	3.09813	116.469	10.5025	1.03833	Russo et al 2019a, Treanore et al 2019
17	Asterales	Asteraceae	Oreostemma	Oreostemma alpigineum	tundra aster	plant	anther	flower	n	102.707	3.01666	143.595	6.46297	0.715255	Francis
18	Asterales	Asteraceae	Rudbeckia	Rudbeckia hirta	black eyed susan	plant	fresh	flower	n	136.227	21.8766	189.903	12.4554	0.71735	Russo et al 2019a
19	Asterales	Asteraceae	Solidago	Solidago altissima	goldenrod	plant	fresh	flower	n	51.9855	3.31278	73.9672	5.28253	0.702818	Yip
20	Asterales	Asteraceae	Symphyotrichum	Symphyotrichum novae-angliae	new england aster	plant	fresh	flower	y	91.0399	8.87531	84.0316	2.00411	1.0834	Vaudo et al 2016
21	Asterales	Asteraceae	Taraxacum	Taraxacum sp	danelion	plant	bee	bee	n	65.8493	3.36816	93.4912	15.0979	0.704337	Vanderplanck and Michez
22	Asterales	Campanulaceae	Lobelia	Lobelia cardinalis	Cardinalflower	plant	anther	flower	y	158.053	31.6625	74.1928	5.57195	2.1303	Jackson and Fiely
23	Brassicales	Brassicaceae	Brassica	Brassica napus	canola	plant	fresh	flower	n	136.246	9.95825	70.5393	7.37408	1.93149	Treanore
24	Brassicales	Brassicaceae	Raphanus	Raphanus raphanistrum	wild radish	plant	bee	bee	n	68.8836	12.528	22.0668	0.334822	3.1216	Vanderplanck and Michez
25	Caryophyllales	Montiaceae	Calyptridium	Calyptridium umbellatum	pussypaws	plant	anther	flower	n	308.667	30.7825	71.3876	4.8257	4.32382	Vaudo
26	Commelinales	Commelinaceae	Tradescantia	Tradescantia ohiensis	spiderwort	plant	fresh	flower	y	358.25	20.4011	103.737	2.15005	3.45346	Vaudo et al 2016
27	Cucurbitales	Cucurbitaceae	Cucumis	Cucumis sativa	cucumber	plant	fresh	flower	n	66.1735	3.19779	34.193	1.6928	1.93529	Mu and Vaudo
28	Cucurbitales	Cucurbitaceae	Cucurbita	Cucurbita pepo	pumpkin	plant	fresh	flower	n	140.729	21.099	96.7785	6.0188	1.45413	Treanore et al 2019
29	Dipsacales	Adoxaceae	Sambucus	Sambucus canadensis	American black elderberry	plant	anther	flower	y	80.7656	2.47174	72.1695	9.12864	1.11911	Jackson and Fiely
30	Ericales	Actinidiaceae	Actinidia	Actinidia deliciosa	kiwi	plant	mass	flower	n	259.854	3.42687	92.1814	2.17388	2.81895	Antles Pollen Inc.
31	Ericales	Ericaceae	Erica	Erica sp	heather	plant	bee	bee	n	18.2846	1.34101	24.5763	4.27788	0.743996	Vanderplanck and Michez
32	Fabales	Fabaceae	Baptisia	Baptisia australis	Blue false indigo	plant	anther	flower	y	324.418	30.3424	100.354	4.52692	3.23272	Jackson and Fiely
33	Fabales	Fabaceae	Chamaecrista	Chamaecrista fasciculata	partridge pea	plant	fresh	flower	n	92.4089	4.40845	37.2983	2.53828	2.47756	Russo et al 2019a
34	Fabales	Fabaceae	Chamaecrista	Chamaecrista fasciculata	Patridige pea	plant	anther	flower	y	254.685	13.7851	45.0802	5.96949	5.64959	Jackson and Fiely
35	Fabales	Fabaceae	Crotalaria	Crotalaria juncea	sunnhemp	plant	fresh	flower	n	123.539	5.31511	71.9482	5.50258	1.71705	Treanore et al 2019
36	Fabales	Fabaceae	Lupinus	Lupinus lepidus	prairie lupine	plant	anther	flower	n	185.296	13.6933	60.8894	5.53815	3.04316	Francis
37	Fabales	Fabaceae	Robinia	Robinia pseudoacacia	black locust	plant	bee	bee	n	108.038	5.28376	17.3007	1.95301	6.2447	Vanderplanck and Michez
38	Fabales	Fabaceae	Senna	Senna hebecarpa	senna	plant	fresh	flower	y	237.281	23.7635	51.7149	3.16084	4.58825	Vaudo et al 2016
39	Fabales	Fabaceae	Trifolium	Trifolium incarnatum	crimson clover	plant	fresh	flower	n	147.61	14.2843	33.1133	4.47541	4.45774	Treanore
40	Fabales	Fabaceae	Trifolium	Trifolium repens	white clover	plant	bee	bee	n	123.137	20.4269	29.6972	3.92425	4.14642	Russo et al 2019a
41	Fabales	Fabaceae	Vicia	Vicia villosa	hairy vetch	plant	fresh	flower	n	36.5139	1.63483	12.927	1.67084	2.82462	Treanore
42	Fagales	Fagaceae	Castanea	Castanea sativa	sweet chestnut	plant	bee	bee	n	36.513	2.36044	26.2104	4.59515	1.39308	Vanderplanck and Michez
43	Fagales	Fagaceae	Quercus	Quercus pyrenaica	pyrenean oak	plant	bee	bee	n	37.4814	5.21125	31.3233	4.68256	1.1966	Vanderplanck and Michez
44	Hymenoptera	Apidae	Apis	Apis mellifera	honey bee	bee	bee	bee	n	71.238	4.46796	48.101	4.13023	1.48101	Vaudo, Hines
45	Hymenoptera	Apidae	Bombus	Bombus impatiens	bumble bee	bee	bee	bee	y	201.076	5.13606	54.613	1.13158	3.68184	Vaudo et al 2018, Hines
46	Hymenoptera	Megachilidae	Osmia	Osmia cornifrons	Japanese orchard bee	bee	bee	bee	y	161.292	10.5871	55.1873	3.81995	2.92262	Vaudo et al, Biddinger, and Crone
47	Lamales	Lamiaceae	Monarda	Monarda fistulosa	Wild bergamot	plant	anther	flower	y	66.3817	38.4422	54.9474	0.0790744	1.2081	Jackson and Fiely
48	Lamales	Lamiaceae	Scutellaria	Scutellaria incana	Hoary skullcap	plant	anther	flower	y	159.293	41.7026	119.013	13.6046	1.33844	Jackson and Fiely
49	Lamiales	Orobanchaceae	Pedicularis	Pedicularis attollens	little elephant's head	plant	anther	flower	n	448.055	2.0641	76.6289	4.65286	5.84707	Vaudo
50	Lamiales	Phrymaceae	Mimulus	Mimulus ringens	Square stemmed monkeyflower	plant	anther	flower	y	139.73	23.6533	30.296	3.80392	4.61216	Jackson and Fiely
51	Lamiales	Plantaginaceae	Chelone	Chelone glabra	White turtlehead	plant	anther	flower	y	191.974	20.7364	61.4811	2.14735	3.12248	Jackson and Fiely
52	Lamiales	Plantaginaceae	Penstemon	Penstemon canescens	Easter gray beardtongue	plant	anther	flower	y	395.766	29.0572	55.9521	5.45332	7.07329	Jackson and Fiely
53	Lamiales	Plantaginaceae	Penstemon	Penstemon hirsutus	Hairy beardtongue	plant	anther	flower	y	473.596	8.87528	35.6137	5.18182	13.2982	Jackson and Fiely
54	Lamiales	Plantaginaceae	Penstemon	Penstemon laevigatus	Appalachian beardtongue	plant	anther	flower	y	371.803	38.6553	63.1852	10.8272	5.88434	Jackson and Fiely
55	Lamiales	Plantaginaceae	Penstemon	Penstemon rydbergii	meadow penstemon	plant	anther	flower	n	484.224	10.963	101.093	11.8557	4.78991	Francis
56	Lamiales	Plantaginaceae	Veronicastrum	Veronicastrum virginicum	culver's root	plant	fresh	flower	y	186.721	12.1147	83.7127	3.68611	2.23049	Vaudo et al 2016
57	Lamiales	Scrophulariaceae	Verbascum	Verbascum sp	velvet plant	plant	bee	bee	n	63.9816	13.5058	79.6244	16.095	0.803543	Vanderplanck and Michez
58	Liliales	Liliaceae	Lilium	Lilium superbum	Turk's cap lily	plant	anther	flower	y	53.9762	10.0927	246.173	25.8175	0.219261	Jackson and Fiely
59	Malpighiales	Hypericaceae	Hypericum	Hypericum pyramidatum	Great St. Johnswort	plant	anther	flower	y	295.192	39.109	34.9124	5.2417	8.45524	Jackson and Fiely
60	Malpighiales	Salicaceae	Salix	Salix caprea	willow	plant	bee	bee	n	45.8705	2.61758	37.1456	2.32662	1.23488	Vanderplanck and Michez
61	Malpighiales	Salicaceae	Salix	Salix fragiles	willow	plant	bee	bee	n	17.1785	NA	26.4009	NA	0.650679	Vanderplanck and Michez
62	Malvales	Cistaceae	Cistus	Cistus sp	rockrose	plant	bee	bee	n	41.2545	3.84618	23.7734	1.38779	1.73532	Vanderplanck and Michez
63	Malvales	Malvaceae	Hibiscus	Hibiscus moscheutos	Crimsoneyed rosemallow	plant	anther	flower	y	30.7675	2.75042	72.412	14.2813	0.424894	Jackson and Fiely
64	Malvales	Malvaceae	Sidalcea	Sidalcea glaucescens	waxy checkerbloom	plant	fresh	flower	n	15.0474	1.54577	113.076	15.8632	0.133073	Vaudo
65	Myrtales	Onagraceae	Oenothera	Oenothera biennis	Evening primrose	plant	anther	flower	y	88.0109	4.0572	58.3156	3.24383	1.50922	Jackson and Fiely
66	Poales	Poaceae	Zea	Zea mays	corn	plant	bee	bee	n	62.5883	5.80896	52.9463	5.06366	1.18211	Vanderplanck and Michez
67	Ranunculales	Papaveraceae	Papaver	Papaver rhoeus	poppy	plant	bee	bee	n	198.125	9.31337	50.2381	12.4805	3.94372	Vanderplanck and Michez
68	Ranunculales	Ranunculaceae	Anemone	Anemone canadensis	Canada anemone	plant	anther	flower	y	144.029	3.55206	36.1167	1.46344	3.98787	Jackson and Fiely
69	Ranunculales	Ranunculaceae	Anemone	Anemone virginiana	Thimbleweed	plant	anther	flower	y	178.964	17.7265	48.9773	3.05978	3.65402	Jackson and Fiely
70	Ranunculales	Ranunculaceae	Aquilegia	Aquilegia canadensis	Eastern columbine	plant	anther	flower	y	394.955	18.67	82.0457	2.72826	4.81384	Jackson and Fiely
71	Ranunculales	Ranunculaceae	Cimicifuga	Cimicifuga racemosa	Black cohosh	plant	anther	flower	y	65.1111	2.64568	82.5547	4.06274	0.788702	Jackson and Fiely
72	Ranunculales	Ranunculaceae	Thalictrum	Thalictrum pubescens	Tall meadow rue	plant	anther	flower	y	54.9748	12.9834	20.7259	1.04849	2.65247	Jackson and Fiely
73	Rosales	Rhamnaceae	Rhamnus	Rhamnus frangula	buckthorn	plant	bee	bee	n	41.0604	6.59387	17.933	0.669951	2.28965	Vanderplanck and Michez
74	Rosales	Rosaceae	Crataegus	Crataegus monogyna	hawthorn	plant	bee	bee	n	82.9187	14.1353	19.2196	0.830696	4.31428	Vanderplanck and Michez
75	Rosales	Rosaceae	Horkelia	Horkelia fusca	pinewoods/dusky horkelia	plant	anther	flower	n	90.0166	8.29581	102.403	4.54911	0.879039	Francis
76	Rosales	Rosaceae	Malus	Malus pumila	apple	plant	mass	flower	n	152.564	16.4243	95.6074	4.72799	1.59574	Antles Pollen Inc.
77	Rosales	Rosaceae	Potentilla	Potentilla gracillis	graceful cinquefoil	plant	anther	flower	n	171.199	11.3391	144.962	2.51597	1.18099	Francis
78	Rosales	Rosaceae	Prunus	Prunus armeniaca	apricot	plant	mass	flower	n	139.292	4.74229	67.3337	9.12752	2.06868	Antles Pollen Inc.
79	Rosales	Rosaceae	Prunus	Prunus avium	cherry lapins	plant	mass	flower	n	155.208	48.4924	91.3379	22.6026	1.69927	Antles Pollen Inc.
80	Rosales	Rosaceae	Prunus	Prunus cerasus	sour cherry	plant	bee	bee	n	92.918	14.1271	47.3178	6.36464	1.9637	Vanderplanck and Michez
81	Rosales	Rosaceae	Prunus	Prunus dulcis	almond	plant	mass	flower	n	114.374	3.50108	96.6045	6.76655	1.18394	Antles Pollen Inc.
82	Rosales	Rosaceae	Prunus	Prunus spp	plum	plant	mass	flower	n	49.898	5.5176	84.7728	2.07444	0.588609	Antles Pollen Inc.
83	Rosales	Rosaceae	Pyrus	Pyrus spp	pear	plant	mass	flower	n	68.1558	5.12796	75.6494	15.626	0.900943	Antles Pollen Inc.
84	Rosales	Rosaceae	Rosa	Rosa palustris	Swamp rose	plant	anther	flower	y	73.5595	18.9836	45.5815	3.76279	1.6138	Jackson and Fiely
85	Rosales	Rosaceae	Rubus	Rubus sp	raspberry	plant	bee	bee	n	66.3695	15.106	37.8917	1.76232	1.75156	Vanderplanck and Michez
86	Sapindales	Anacardiaceae	Pistacia	Pistacia vera	pistachio	plant	mass	flower	n	31.7999	1.4727	68.7027	1.25066	0.462863	Antles Pollen Inc.
87	Solanales	Solanaceae	Capsicum	Capsicum annuum jalepeno	Jalepeno	plant	fresh	flower	n	180.156	19.6467	25.9512	3.40539	6.94209	Safari
88	Solanales	Solanaceae	Capsicum	Capsicum annuum marengo	Marengo	plant	fresh	flower	n	124.952	11.9999	35.7025	2.37972	3.49981	Safari
